# Supplementary material for: The Exoproteome of Staphylococcus pasteuri Isolated from Cervical Mucus during the Estrus Phase in Water Buffalo (Bubalus bubalis)
Source: MDPI journal article supplement (doi:10.3390/biom12030450), 2022-03-15
Supplement: s1 [file s1]

## S2.1. Isolation and characterization of bacteria

For the isolation of bacteria, the CM was collected from twelve healthy buffaloes. The CM of all 12 subjects, each running through the three phases of the oestrous cycle, were collected. Thus, we had 36 CM samples (Preestrus 12, Estrus 12, and Diestrus 12). These samples were pooled as samples from four animals representing each phase (Preestrus-4, Estrus-4 and Diestrus-4; thus, four pooled samples for each phase) and subjected to further analysis. Each analysis was conducted on triplicate samples from each pool. CM, 0.5 mL, was homogenized in 4.5 mL of sterile distilled water. An aliquot of 0.1 mL of the homogenate was serially diluted and plated in Mannitol salt- agar by standard plate count method (Cassoli et al. 2016). Plates were incubated at 37°C for 24-48 hr. Following the incubation, the bacterial colonies were counted and expressed by log values (Log CFU/mL i.e.  $\text{Log}_{10} (\text{CFU} / (\text{dilution factor} \times \text{aliquot}))$ . Morphologically distinct colonies alone were picked and further processed. Primary characterization was carried out based on colony morphology which included colour, size and shape. Further, the isolates were confirmed by Gram staining and biochemical tests for catalase, oxidase, sugar fermentation and haemolysis (Srinivasan et al., 2021). Finally the sequence were submitted in NCBI (accession number: MT598013.1).

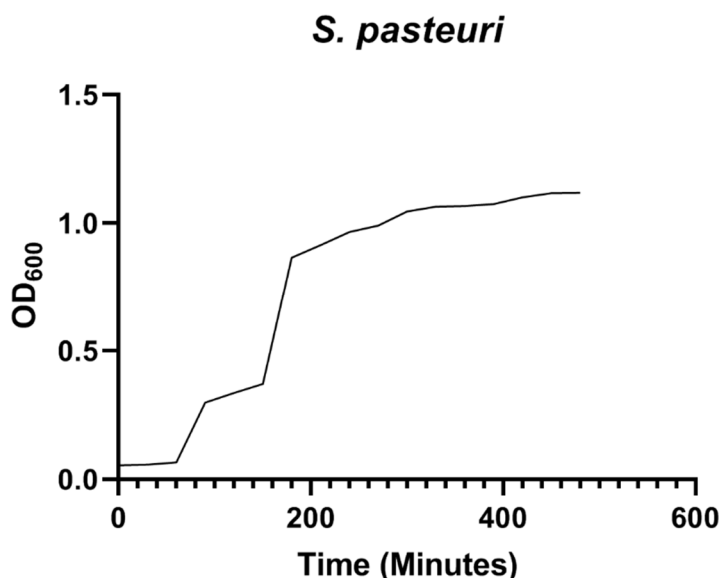

**Figure S1: Growth curve of *S. pasteurii*.** The OD values are observed at every 30 minutes and the values are plotted for 8 hours.

**Table S1. Physiological properties of identified compounds from bacteria *S. pasteurii* of estrus CM**

| <b>Identified compounds</b> | <b>PubC hem</b> | <b>MW (g/mol)</b> | <b>Chemical formula</b> | <b>Canonical smiles</b> |
|-----------------------------|-----------------|-------------------|-------------------------|-------------------------|
| <b>Acetic acid</b>          | 176             | 60.05             | <a href="#">C2H4O2</a>  | CC(=O)O                 |
| <b>Butanoic acid</b>        | 264             | 88.11             | <a href="#">C4H8O2</a>  | CCCC(=O)O               |
| <b>Propanoic acid</b>       | 1032            | 74.08             | <a href="#">C3H6O2</a>  | CCC(=O)O                |
| <b>Isobutyric acid</b>      | 6590            | 88.11             | <a href="#">C4H8O2</a>  | CC(C)C(=O)O             |
| <b>Valeric acid</b>         | 7991            | 102.13            | <a href="#">C5H10O2</a> | CCCCC(=O)O              |
| <b>Isovaleric acid</b>      | 10430           | 102.13            | <a href="#">C5H10O2</a> | CC(C)CC(=O)O            |

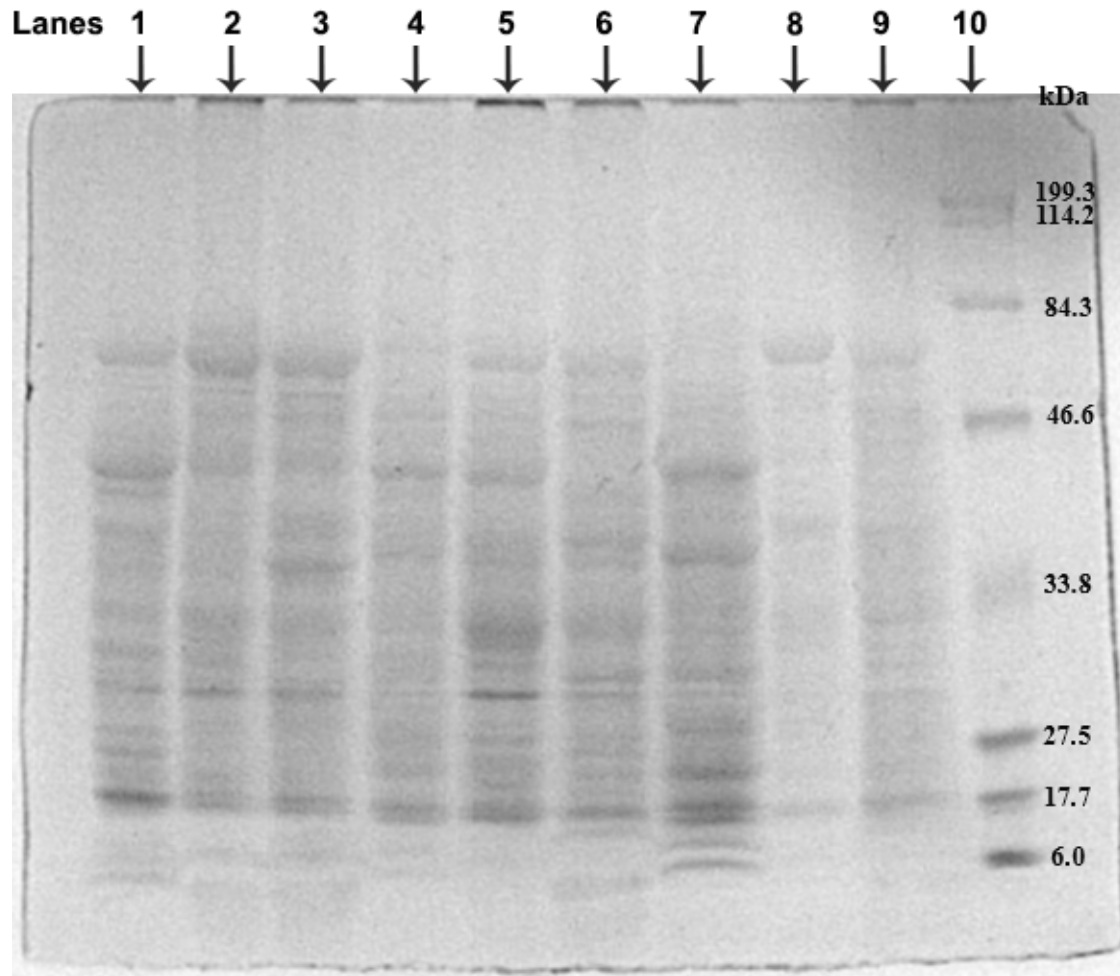

**Figure S2. SDS-PAGE.** 1D gel electrophoresis of *S. pasteurii* secretory proteins collected during estrus CM. Each lanes have duplicated samples of *S. pasteurii* extracellular proteins (at various concentrations, as follows: Lanes 1-3&5: 20 $\mu$ g; Lane 4, 8&9: 10 $\mu$ g; Lane 6&7: 30 $\mu$ g) along with standard protein marker (Lane 10: 6 $\mu$ L).

**Table S2. List of total proteins identified from *S. pasteurii* secretome.**

| S.No | Protein<br>Accession ID | Protein Description                                                            | #<br>AAs | MW<br>[kDa] | calc.<br>pI | #<br>Peptides |
|------|-------------------------|--------------------------------------------------------------------------------|----------|-------------|-------------|---------------|
| 1.   | A0A0M2NQR9              | Elongation factor Tu                                                           | 394      | 43.2        | 4.87        | 22            |
| 2.   | A0A431ZL22              | 60 kDa chaperonin                                                              | 541      | 57.5        | 4.67        | 14            |
| 3.   | A0A269XJ15              | Enolase                                                                        | 434      | 47.2        | 4.65        | 13            |
| 4.   | A0A269XHD8              | Fructose-bisphosphate aldolase class 1                                         | 296      | 33          | 4.91        | 12            |
| 5.   | A0A431ZQ83              | Elongation factor Tu                                                           | 396      | 43.3        | 4.83        | 10            |
| 6.   | A0A269XJ26              | Elongation factor G                                                            | 693      | 76.7        | 4.89        | 10            |
| 7.   | A0A269XLM5              | Dihydrolipoyl dehydrogenase                                                    | 468      | 49.6        | 4.82        | 9             |
| 8.   | A0A269XNB0              | 30S ribosomal protein S4                                                       | 200      | 23.2        | 9.88        | 9             |
| 9.   | A0A0M2NRP5              | ATP synthase subunit beta                                                      | 470      | 51.4        | 4.73        | 8             |
| 10.  | A0A431ZNX2              | ATP synthase subunit beta                                                      | 471      | 51.3        | 4.98        | 8             |
| 11.  | A0A0M2NQC0              | Pyruvate kinase                                                                | 585      | 63.1        | 5.19        | 8             |
| 12.  | A0A0M2NQR2              | DNA-directed RNA polymerase subunit beta                                       | 1207     | 135         | 6.3         | 8             |
| 13.  | A0A0M2NUT6              | Dihydrolipoyl dehydrogenase                                                    | 468      | 49.6        | 4.87        | 7             |
| 14.  | A0A269XK66              | Glutamate--tRNA ligase                                                         | 484      | 56.2        | 5.07        | 7             |
| 15.  | A0A0M2NPE4              | Glucose-6-phosphate isomerase                                                  | 443      | 49.6        | 5.08        | 7             |
| 16.  | A0A0M2NJY7              | Arginine deiminase                                                             | 411      | 47.3        | 5.17        | 7             |
| 17.  | A0A269XK51              | Dihydrolipoamide acetyltransferase component of pyruvate dehydrogenase complex | 435      | 47          | 5           | 7             |

|     |            |                                                             |      |       |      |   |
|-----|------------|-------------------------------------------------------------|------|-------|------|---|
| 18. | A0A269XIL3 | Arginine--tRNA ligase                                       | 553  | 62.6  | 5.29 | 6 |
| 19. | A0A3S0MQB3 | Acetolactate synthase AlsS                                  | 554  | 60.5  | 4.98 | 6 |
| 20. | A0A269XH97 | Probable malate:quinone oxidoreductase                      | 499  | 56.2  | 6.55 | 6 |
| 21. | A0A0M2NTM6 | Glycerol-3-phosphate dehydrogenase                          | 557  | 62.3  | 6.77 | 6 |
| 22. | A0A269XJK1 | Glyceraldehyde-3-phosphate dehydrogenase                    | 335  | 36.1  | 4.97 | 6 |
| 23. | A0A0M2NK15 | 60 kDa chaperonin                                           | 540  | 57.7  | 4.64 | 6 |
| 24. | A0A269XKU5 | 2,3-bisphosphoglycerate-independent phosphoglycerate mutase | 505  | 56.3  | 4.86 | 6 |
| 25. | A0A269XK85 | 50S ribosomal protein L2                                    | 277  | 30.2  | 10.9 | 5 |
| 26. | A0A269XHG3 | Acetolactate synthase large subunit (Fragment)              | 482  | 52.8  | 4.96 | 5 |
| 27. | A0A269XHW6 | 50S ribosomal protein L5                                    | 179  | 20.2  | 9.32 | 5 |
| 28. | A0A269XH42 | L-lactate dehydrogenase                                     | 318  | 34.3  | 5.16 | 5 |
| 29. | A0A269XIT4 | Betaine-aldehyde dehydrogenase                              | 496  | 54.6  | 4.93 | 5 |
| 30. | A0A269XEX6 | Formate acetyltransferase                                   | 748  | 84.8  | 5.48 | 5 |
| 31. | A0A0M2NV34 | ATP-dependent Clp protease ATP-binding subunit ClpC         | 817  | 91    | 5.68 | 5 |
| 32. | A0A0M2NRP2 | DNA-directed RNA polymerase subunit beta                    | 1183 | 132.9 | 4.97 | 5 |
| 33. | A0A0M2NN96 | Iron-sulfur cluster assembly protein SufB                   | 465  | 52.5  | 5.17 | 5 |
| 34. | A0A0M2NR05 | Chaperone protein DnaK                                      | 611  | 66.3  | 4.73 | 5 |
| 35. | A0A0M2NR25 | Oleate hydratase                                            | 591  | 67.6  | 6.39 | 5 |
| 36. | A0A0M2NX32 | Alanine dehydrogenase                                       | 372  | 40    | 5.35 | 4 |
| 37. | A0A3S0LXA1 | Alanine dehydrogenase                                       | 370  | 39.8  | 5.45 | 4 |
| 38. | A0A3S0ML13 | Enolase                                                     | 434  | 47.1  | 4.61 | 4 |

|     |            |                                                             |     |      |      |   |
|-----|------------|-------------------------------------------------------------|-----|------|------|---|
| 39. | A0A431ZL71 | Dihydrolipoyl dehydrogenase                                 | 468 | 49   | 5.16 | 4 |
| 40. | A0A0M2NV81 | Elongation factor Ts                                        | 292 | 32.3 | 5.12 | 4 |
| 41. | A0A0M2NMB1 | ATP synthase subunit alpha                                  | 502 | 54.5 | 4.92 | 4 |
| 42. | A0A0M2NRL0 | Uncharacterized protein                                     | 199 | 22.6 | 5.35 | 4 |
| 43. | A0A0M2NRE1 | 50S ribosomal protein L6                                    | 178 | 19.6 | 9.35 | 4 |
| 44. | A0A3S0M1J9 | Chaperone protein DnaK                                      | 611 | 65.9 | 4.67 | 4 |
| 45. | A0A0M2NP59 | Translation initiation factor IF-2                          | 724 | 80   | 5.17 | 4 |
| 46. | A0A269XJN9 | 1,4-dihydroxy-2-naphthoyl-CoA synthase                      | 272 | 30.2 | 5.45 | 4 |
| 47. | A0A431ZSJ1 | Glucose-6-phosphate isomerase                               | 445 | 49.7 | 4.94 | 4 |
| 48. | A0A0M2NU72 | 2,3-bisphosphoglycerate-independent phosphoglycerate mutase | 505 | 56.3 | 4.89 | 4 |
| 49. | A0A0M2NP53 | Ribosome-recycling factor                                   | 184 | 20.3 | 5.07 | 4 |
| 50. | A0A0M2NVX0 | 6-phosphogluconate dehydrogenase, decarboxylating           | 469 | 51.9 | 5.08 | 4 |
| 51. | A0A0M2NR12 | Lysine--tRNA ligase                                         | 495 | 57   | 5.29 | 4 |
| 52. | A0A0M2NTH8 | 30S ribosomal protein S2                                    | 262 | 29.7 | 5.68 | 4 |
| 53. | A0A0M2NUC7 | Superoxide dismutase                                        | 199 | 22.6 | 5.11 | 3 |
| 54. | A0A431ZD84 | Succinate dehydrogenase flavoprotein subunit                | 587 | 65.4 | 5.85 | 3 |
| 55. | A0A0M2NS92 | Alkyl hydroperoxide reductase C                             | 189 | 21.1 | 4.78 | 3 |
| 56. | A0A0M2NXE7 | Pyridoxal 5'-phosphate synthase subunit PdxS                | 295 | 31.9 | 5.36 | 3 |
| 57. | A0A0M2NKL3 | GMP synthase [glutamine-hydrolyzing]                        | 513 | 58   | 4.92 | 3 |
| 58. | A0A431ZQL6 | Elongation factor G                                         | 693 | 76.8 | 4.97 | 3 |
| 59. | A0A269XKH3 | Alpha-ketoacid dehydrogenase subunit beta                   | 325 | 35.2 | 4.73 | 3 |

|     |            |                                                        |     |      |      |   |
|-----|------------|--------------------------------------------------------|-----|------|------|---|
| 60. | A0A3S0MQV9 | Glycerol-3-phosphate dehydrogenase                     | 558 | 62.9 | 7.28 | 3 |
| 61. | A0A0M2NVE2 | Phosphoenolpyruvate-protein phosphotransferase         | 572 | 63.2 | 4.69 | 3 |
| 62. | A0A0M2NT47 | 30S ribosomal protein S3                               | 218 | 24.3 | 9.72 | 3 |
| 63. | A0A0M2NK92 | Beta sliding clamp                                     | 377 | 42   | 4.83 | 3 |
| 64. | A0A431ZLM1 | Phosphoenolpyruvate-protein phosphotransferase         | 570 | 63.1 | 4.78 | 3 |
| 65. | A0A431ZFK4 | Enoyl-[acyl-carrier-protein] reductase [NADPH]         | 257 | 28.4 | 6.55 | 3 |
| 66. | A0A0M2NP47 | ATP-dependent protease ATPase subunit HslU             | 467 | 52.5 | 5.11 | 3 |
| 67. | A0A269XG65 | Phosphoglucosamine mutase                              | 451 | 49   | 4.7  | 3 |
| 68. | A0A0M2NUU4 | UPF0637 protein UF70_0699                              | 204 | 24.1 | 6.92 | 3 |
| 69. | A0A0M2NV72 | Succinate--CoA ligase [ADP-forming] subunit beta       | 388 | 42.1 | 4.84 | 3 |
| 70. | A0A269XKW4 | Asparagine--tRNA ligase                                | 430 | 49.3 | 5.4  | 3 |
| 71. | A0A0M2NQA4 | Translation initiation factor IF-3                     | 175 | 20.3 | 9.66 | 3 |
| 72. | A0A0M2NVT8 | GTP-sensing transcriptional pleiotropic repressor CodY | 257 | 28.7 | 5.95 | 3 |
| 73. | A0A0M2NLN7 | Inosine-5'-monophosphate dehydrogenase                 | 488 | 52.5 | 5.33 | 3 |
| 74. | A0A431ZII9 | Fe-S cluster assembly ATPase SufC                      | 259 | 29.2 | 4.7  | 2 |
| 75. | A0A0M2NPX7 | Cell division protein FtsZ                             | 392 | 41.1 | 4.94 | 2 |
| 76. | A0A0M2NNQ3 | Cysteine synthase                                      | 310 | 33.1 | 5.36 | 2 |
| 77. | A0A3S0KQH4 | Adenylosuccinatelyase                                  | 431 | 49.8 | 5.76 | 2 |
| 78. | A0A0M2NJB2 | 50S ribosomal protein L25                              | 221 | 24.4 | 4.27 | 2 |
| 79. | A0A0M2NPS6 | GTPase Der                                             | 436 | 49   | 5.36 | 2 |
| 80. | A0A0M2NV51 | Dihydroxyacetone kinase family protein                 | 549 | 60.1 | 4.64 | 2 |

|      |            |                                                                   |     |      |      |   |
|------|------------|-------------------------------------------------------------------|-----|------|------|---|
| 81.  | A0A0M2NV50 | Chaperone protein ClpB                                            | 868 | 98.1 | 5    | 2 |
| 82.  | A0A3S0K7L9 | Probable malate:quinone oxidoreductase                            | 498 | 56.3 | 6.55 | 2 |
| 83.  | A0A3S0MTQ0 | Glyceraldehyde-3-phosphate dehydrogenase                          | 336 | 36.4 | 4.93 | 2 |
| 84.  | A0A0M2NUK8 | Oligoendopeptidase F                                              | 602 | 69.8 | 4.93 | 2 |
| 85.  | A0A431ZIA0 | RNA polymerase sigma factor SigA                                  | 369 | 42.3 | 5.14 | 2 |
| 86.  | A0A0M2NV39 | Cysteine--tRNA ligase                                             | 466 | 54   | 5.21 | 2 |
| 87.  | A0A0M2NUI1 | Argininosuccinate synthase                                        | 400 | 44.5 | 5.01 | 2 |
| 88.  | A0A0M2NU61 | ATP-dependent Clp protease proteolytic subunit                    | 196 | 21.6 | 5.03 | 2 |
| 89.  | A0A0M2NQT1 | Glucose-6-phosphate 1-dehydrogenase                               | 494 | 56.9 | 5.76 | 2 |
| 90.  | A0A0M2NVG1 | Aconitate hydratase                                               | 901 | 99.2 | 4.87 | 2 |
| 91.  | A0A269XJC2 | Dihydroxyacetone kinase subunit DhaK                              | 322 | 35   | 4.98 | 2 |
| 92.  | A0A3S0THC8 | Beta sliding clamp                                                | 377 | 42.2 | 4.87 | 2 |
| 93.  | A0A0M2NX25 | ATP-dependent 6-phosphofructokinase                               | 322 | 34.8 | 5.58 | 2 |
| 94.  | A0A3S0K8S3 | 4-hydroxy-3-methylbut-2-en-1-yl diphosphate synthase (flavodoxin) | 366 | 39.4 | 5.92 | 2 |
| 95.  | A0A0M2NUP3 | Threonine--tRNA ligase                                            | 645 | 74.7 | 5.27 | 2 |
| 96.  | A0A0M2NNA6 | Uracil phosphoribosyltransferase                                  | 209 | 23.1 | 5.9  | 2 |
| 97.  | A0A269XGV9 | Pantothenatesynthetase                                            | 283 | 32   | 4.93 | 2 |
| 98.  | A0A3S0MZI0 | Glycerophosphoryldiester phosphodiesterase                        | 247 | 27.9 | 5.02 | 2 |
| 99.  | A0A3S0TG30 | HPr kinase/phosphorylase                                          | 310 | 34.5 | 6.44 | 2 |
| 100. | A0A269XHX4 | Iron citrate ABC transporter substrate-binding protein            | 335 | 37.3 | 9.07 | 2 |
| 101. | A0A3S0M671 | Glutamine synthetase                                              | 446 | 50.7 | 5.02 | 2 |



|             |            |                                                     |     |      |      |   |
|-------------|------------|-----------------------------------------------------|-----|------|------|---|
| <b>102.</b> | A0A0M2NP92 | Glutamine synthetase                                | 446 | 50.9 | 5.12 | 2 |
| <b>103.</b> | A0A0M2NSM8 | Lipoprotein                                         | 269 | 30.1 | 9.26 | 2 |
| <b>104.</b> | A0A3S0KCT6 | Ribosome-recycling factor                           | 184 | 20.5 | 4.98 | 2 |
| <b>105.</b> | A0A0M2NL96 | Two-component response regulator SA14-24            | 233 | 27.1 | 5.12 | 2 |
| <b>106.</b> | A0A0M2NRM8 | Ornithine carbamoyltransferase                      | 335 | 37.7 | 5.26 | 2 |
| <b>107.</b> | A0A431ZT99 | TIGR00282 family metallophosphoesterase             | 263 | 29.5 | 7.2  | 2 |
| <b>108.</b> | A0A3S0NDB3 | Purine nucleoside phosphorylase DeoD-type           | 236 | 25.6 | 4.74 | 1 |
| <b>109.</b> | A0A0M2NPD4 | Peptidyl-prolyl cis-transisomerase                  | 197 | 21.7 | 4.7  | 1 |
| <b>110.</b> | A0A0M2NSM3 | Glycine cleavage system H protein                   | 126 | 14.2 | 3.94 | 1 |
| <b>111.</b> | A0A431ZQL1 | Ornithine aminotransferase                          | 396 | 43.6 | 5.24 | 1 |
| <b>112.</b> | A0A431ZS97 | DNA-directed RNA polymerase subunit alpha           | 314 | 35   | 4.83 | 1 |
| <b>113.</b> | A0A0M2NM54 | Iron-sulfur cluster carrier protein                 | 354 | 38.5 | 5.16 | 1 |
| <b>114.</b> | A0A0M2NRC0 | 1-acyl-sn-glycerol-3-phosphate acyltransferase      | 205 | 22.8 | 9.61 | 1 |
| <b>115.</b> | A0A269XLK0 | Tyrosine--tRNA ligase                               | 420 | 47.5 | 5.55 | 1 |
| <b>116.</b> | A0A0M2NML5 | L-lactate permease                                  | 533 | 56.7 | 9.16 | 1 |
| <b>117.</b> | A0A0M2NR92 | D-serine/D-alanine/glycine transporter              | 453 | 50.2 | 9.42 | 1 |
| <b>118.</b> | A0A0M2NVW7 | Protein RecA                                        | 348 | 37.8 | 5.45 | 1 |
| <b>119.</b> | A0A0M2NTD5 | CTP synthase                                        | 535 | 59.9 | 5.35 | 1 |
| <b>120.</b> | A0A3S0KQ60 | Protein translocase subunit SecA                    | 843 | 96.3 | 5.33 | 1 |
| <b>121.</b> | A0A3S0M2Q9 | Serine hydroxymethyltransferase                     | 413 | 45.4 | 5.54 | 1 |
| <b>122.</b> | A0A0M2NR73 | ATP-dependent Clp protease ATP-binding subunit ClpX | 420 | 46.3 | 4.58 | 1 |

|      |            |                                              |     |      |       |   |
|------|------------|----------------------------------------------|-----|------|-------|---|
| 123. | A0A0M2NS80 | Hydroxymethylglutaryl-CoA synthase           | 388 | 43.3 | 4.88  | 1 |
| 124. | A0A0M2NVV7 | Ribonuclease J                               | 557 | 62.4 | 6.15  | 1 |
| 125. | A0A269XI07 | Alkaline shock protein 23                    | 173 | 19.6 | 5.06  | 1 |
| 126. | A0A3S0KF36 | 50S ribosomal protein L2                     | 277 | 30.3 | 10.84 | 1 |
| 127. | A0A0M2NP63 | Polyribonucleotide nucleotidyltransferase    | 699 | 77.1 | 5     | 1 |
| 128. | A0A269XLL2 | UDP-N-acetylmuramate--L-alanine ligase       | 437 | 49.4 | 5.15  | 1 |
| 129. | A0A0M2NUH7 | Glutamate dehydrogenase                      | 414 | 45.6 | 5.17  | 1 |
| 130. | A0A0M2NMR4 | Uncharacterized protein                      | 205 | 23.7 | 4.79  | 1 |
| 131. | A0A0M2NQS1 | Glutamate-1-semialdehyde 2,1-aminomutase     | 429 | 46.9 | 5.22  | 1 |
| 132. | A0A0M2NUS2 | Phosphoglycerate kinase                      | 396 | 42.7 | 5.08  | 1 |
| 133. | A0A0M2NUM8 | Glutamate-1-semialdehyde 2,1-aminomutase     | 428 | 46.4 | 5.08  | 1 |
| 134. | A0A269XG97 | Transglycosylase                             | 246 | 25.7 | 5.39  | 1 |
| 135. | A0A0M2NM89 | Fructose-1,6-bisphosphate aldolase           | 286 | 30.7 | 4.97  | 1 |
| 136. | A0A0M2NMH3 | 3-hexulose-6-phosphate synthase              | 210 | 22.5 | 4.6   | 1 |
| 137. | A0A0M2NN17 | 30S ribosomal protein S5                     | 166 | 17.7 | 9.99  | 1 |
| 138. | A0A3S0KF75 | Protein RecA                                 | 360 | 39   | 5.87  | 1 |
| 139. | A0A269XKD8 | Flavohemoglobin                              | 381 | 42.8 | 5.06  | 1 |
| 140. | A0A0M2NSP9 | Uncharacterized protein                      | 258 | 26.8 | 6.52  | 1 |
| 141. | A0A3S0KKL9 | Translation initiation factor IF-3           | 176 | 20.4 | 9.63  | 1 |
| 142. | A0A269XMH7 | Probable quinol oxidase subunit 1            | 662 | 75.1 | 7.46  | 1 |
| 143. | A0A0M2NP49 | Two component transcriptional regulator VraR | 209 | 23.5 | 5.07  | 1 |

|      |            |                                                           |     |       |       |   |
|------|------------|-----------------------------------------------------------|-----|-------|-------|---|
| 144. | A0A0M2NS09 | Acyl-CoA synthetase                                       | 529 | 59.8  | 5.22  | 1 |
| 145. | A0A0M2NQ19 | tRNA-t(6)A37 methylthiotransferase                        | 448 | 51.1  | 5.52  | 1 |
| 146. | A0A269XL77 | Peptide methionine sulfoxide reductase MsrA               | 175 | 20.3  | 5.73  | 1 |
| 147. | A0A269XJ58 | Histidine phosphatase family protein                      | 196 | 22.3  | 6.37  | 1 |
| 148. | A0A3S0M5J8 | Malate dehydrogenase                                      | 310 | 33.3  | 4.83  | 1 |
| 149. | A0A269XGN1 | 2,3-bisphosphoglycerate-dependent phosphoglycerate mutase | 228 | 26.7  | 5.66  | 1 |
| 150. | A0A0M2NVU3 | DNA-binding protein HBSu                                  | 90  | 9.6   | 9.52  | 1 |
| 151. | A0A269XLH9 | Acetate kinase                                            | 412 | 45.7  | 5.66  | 1 |
| 152. | A0A269XHG9 | 50S ribosomal protein L4                                  | 207 | 22.5  | 10.07 | 1 |
| 153. | A0A0M2NWX8 | GTPaseObg                                                 | 430 | 47    | 5.36  | 1 |
| 154. | A0A0M2NWN4 | S-adenosylmethionine synthase                             | 399 | 44    | 4.89  | 1 |
| 155. | A0A431ZH60 | 1-deoxy-D-xylulose 5-phosphate reductoisomerase           | 376 | 41.9  | 5.27  | 1 |
| 156. | A0A0M2NV13 | Cell division protein FtsA                                | 465 | 52.2  | 4.51  | 1 |
| 157. | A0A3S0KC93 | Thioredoxin reductase                                     | 315 | 34.1  | 4.87  | 1 |
| 158. | A0A0M2NPY9 | Dihydroorotase                                            | 425 | 46.7  | 6.64  | 1 |
| 159. | A0A0M2NUM4 | Ribonucleoside-diphosphate reductase                      | 701 | 80.2  | 5.4   | 1 |
| 160. | A0A0M2NRY5 | DNA gyrase subunit A                                      | 894 | 100.4 | 4.98  | 1 |
| 161. | A0A0M2NU79 | Phosphate acetyltransferase                               | 329 | 35.1  | 4.72  | 1 |
| 162. | A0A0M2NSH0 | Triosephosphate isomerase                                 | 253 | 27.3  | 4.88  | 1 |
| 163. | A0A0M2NJ35 | ThiJ/PfpI family protein                                  | 172 | 18.6  | 4.63  | 1 |
| 164. | A0A0M2NSC2 | Ribonucleoside-diphosphate reductase                      | 324 | 37.7  | 5.01  | 1 |

|      |            |                                                                     |     |      |      |   |
|------|------------|---------------------------------------------------------------------|-----|------|------|---|
| 165. | A0A269XLI1 | RNA methyltransferase                                               | 380 | 43.2 | 5.19 | 1 |
| 166. | A0A431ZME9 | Alpha,alpha-phosphotrehalase                                        | 547 | 63.7 | 4.98 | 1 |
| 167. | A0A0M2NUL0 | S-adenosylmethionine:tRNAribosyltransferase-isomerase               | 341 | 38.9 | 5.4  | 1 |
| 168. | A0A0M2NQF9 | Chorismate mutase I                                                 | 363 | 40.8 | 6.23 | 1 |
| 169. | A0A431ZCX0 | Acetate kinase                                                      | 398 | 43.7 | 5.74 | 1 |
| 170. | A0A0M2NQT8 | DNA ligase                                                          | 668 | 75.6 | 5.22 | 1 |
| 171. | A0A0M2NP84 | Glycerol uptake facilitator protein                                 | 272 | 28.1 | 8.25 | 1 |
| 172. | A0A0M2NSI7 | L-Cystine ABC transporter, periplasmic cystine-binding protein TcyA | 260 | 29   | 9.48 | 1 |
| 173. | A0A0M2NQF4 | Bifunctional protein GlmU                                           | 454 | 49.5 | 6.1  | 1 |
| 174. | A0A0M2NT61 | Adenylate kinase                                                    | 216 | 24.1 | 4.83 | 1 |
| 175. | A0A3S0M4Z6 | Molybdenum cofactor biosynthesis protein B                          | 166 | 18.4 | 6.7  | 1 |
| 176. | A0A0M2NT03 | Probable quinol oxidase subunit 2                                   | 372 | 42.5 | 9.07 | 1 |
| 177. | A0A0M2NVJ7 | ABC transporter ATP-binding protein uup                             | 533 | 60.1 | 4.88 | 1 |
| 178. | A0A0M2NJJ7 | Probable manganese-dependent inorganic pyrophosphatase              | 309 | 34.1 | 4.61 | 1 |
| 179. | A0A0M2NQQ9 | Glycerol-3-phosphate dehydrogenase [NAD(P)+]                        | 332 | 35.9 | 5.57 | 1 |
| 180. | A0A3S0KKN2 | Isocitrate dehydrogenase [NADP]                                     | 422 | 46.4 | 5.02 | 1 |
| 181. | A0A0M2NRL6 | Peptidase M20 domain-containing protein 2                           | 394 | 42.8 | 5.69 | 1 |
| 182. | A0A3S0KFP5 | L-lactate permease                                                  | 534 | 56.6 | 9.14 | 1 |
| 183. | A0A3S0MMD7 | Betaine-aldehyde dehydrogenase                                      | 496 | 54.7 | 4.88 | 1 |
| 184. | A0A0M2NVB8 | Probable quinol oxidase subunit 1                                   | 662 | 75.1 | 7.28 | 1 |
| 185. | A0A0M2NUI5 | NERD domain-containing protein                                      | 302 | 35   | 6.34 | 1 |

|             |             |                                                                  |     |      |      |   |
|-------------|-------------|------------------------------------------------------------------|-----|------|------|---|
| <b>186.</b> | A0A0M2NUY0  | Transaldolase                                                    | 237 | 25.8 | 4.83 | 1 |
| <b>187.</b> | A0A3S0THZ0  | 50S ribosomal protein L1                                         | 230 | 24.9 | 9.32 | 1 |
| <b>188.</b> | A0A3S0T9M6  | M20/M25/M40 family metallo-hydrolase                             | 371 | 40.1 | 4.91 | 1 |
| <b>189.</b> | A0A269XGL6  | Alpha-ketoacid dehydrogenase subunit beta                        | 346 | 36.8 | 4.87 | 1 |
| <b>190.</b> | A0A0M2NRD2  | Serine--tRNA ligase                                              | 428 | 48.9 | 5.06 | 1 |
| <b>191.</b> | A0A0M2NTW2  | Bacitracin export permease protein BceB                          | 629 | 71.7 | 9.41 | 1 |
| <b>192.</b> | A0A269XHU6  | UDP-N-acetylglucosamine 1-carboxyvinyltransferase                | 421 | 44.8 | 5.92 | 1 |
| <b>193.</b> | A0A3S0MQP6  | Leucine--tRNA ligase                                             | 794 | 90.9 | 5.01 | 1 |
| <b>194.</b> | A0A431ZLJ1  | Alpha-ketoacid dehydrogenase subunit beta                        | 325 | 35.5 | 4.81 | 1 |
| <b>195.</b> | A0A0M2NVK2  | 2,3,4,5-tetrahydropyridine-2,6-dicarboxylate N-acetyltransferase | 239 | 25.4 | 5.02 | 1 |
| <b>196.</b> | A0A0M2NM68  | Oxidoreductase ylbE                                              | 217 | 23.9 | 5.02 | 1 |
| <b>197.</b> | A0A0M2NKY0  | Putative pyridine nucleotide-disulfide oxidoreductase            | 453 | 50.1 | 4.81 | 1 |
| <b>198.</b> | A0A269XIL4  | Alcohol dehydrogenase                                            | 345 | 37.2 | 4.87 | 1 |
| <b>199.</b> | A0A0M2NQH3  | D-alanine aminotransferase                                       | 282 | 32.1 | 5.11 | 1 |
| <b>200.</b> | A0A431ZSC4  | Ribonuclease Y                                                   | 519 | 58.7 | 5.64 | 1 |
| <b>201.</b> | A0A3S0KHN1  | Pyrimidine-nucleoside phosphorylase                              | 433 | 46.4 | 4.96 | 1 |
| <b>202.</b> | A0A0M2NNN3  | Ribosomal RNA small subunit methyltransferase A                  | 296 | 33.5 | 5.74 | 1 |
| <b>203.</b> | A0A0M2N WV5 | Branched-chain-amino-acid aminotransferase                       | 358 | 40.3 | 4.79 | 1 |
| <b>204.</b> | A0A3S0KDR8  | Coproheme III oxidative decarboxylase                            | 250 | 29.3 | 4.84 | 1 |
| <b>205.</b> | A0A3S0ME43  | Glycosyltransferase family 2 protein                             | 304 | 34.9 | 5.63 | 1 |
| <b>206.</b> | A0A0M2NTE6  | Serine hydroxymethyltransferase                                  | 412 | 45.1 | 6.3  | 1 |

|             |            |                                                                                                   |      |       |      |   |
|-------------|------------|---------------------------------------------------------------------------------------------------|------|-------|------|---|
| <b>207.</b> | A0A431ZMD6 | Cell division protein DivIB                                                                       | 265  | 30    | 6.38 | 1 |
| <b>208.</b> | A0A269XG39 | Glutamine--fructose-6-phosphate aminotransferase [isomerizing]                                    | 601  | 66.2  | 5.05 | 1 |
| <b>209.</b> | A0A0M2NNJ7 | AminoacyltransferaseFemA                                                                          | 411  | 48.8  | 8.65 | 1 |
| <b>210.</b> | A0A3S0KC52 | DUF1430 domain-containing protein                                                                 | 666  | 78.6  | 9.26 | 1 |
| <b>211.</b> | A0A3S0MTT8 | DNA polymerase III subunit gamma/tau                                                              | 563  | 63.3  | 6.32 | 1 |
| <b>212.</b> | A0A0M2NW00 | Uncharacterized protein                                                                           | 83   | 10    | 8.29 | 1 |
| <b>213.</b> | A0A431ZCX8 | Alpha-ketoacid dehydrogenase subunit beta                                                         | 327  | 35.9  | 4.77 | 1 |
| <b>214.</b> | A0A431ZMZ2 | Lipoyl synthase                                                                                   | 306  | 35.2  | 8.31 | 1 |
| <b>215.</b> | A0A0M2NMC9 | D-alanine--D-alanine ligase                                                                       | 356  | 40.2  | 4.94 | 1 |
| <b>216.</b> | A0A0M2NQ23 | NAD-specific glutamate dehydrogenase                                                              | 355  | 39.2  | 4.91 | 1 |
| <b>217.</b> | A0A3S0NC57 | UPF0365 protein CD129_05785                                                                       | 331  | 35.2  | 6.98 | 1 |
| <b>218.</b> | A0A0M2NVP2 | Dihydrolipoyllysine-residue succinyltransferase component of 2-oxoglutarate dehydrogenase complex | 428  | 46.9  | 4.88 | 1 |
| <b>219.</b> | A0A0M2NX74 | Putative cell-wall-anchored protein SasC (LPXTG motif)                                            | 1862 | 201.4 | 4.6  | 1 |

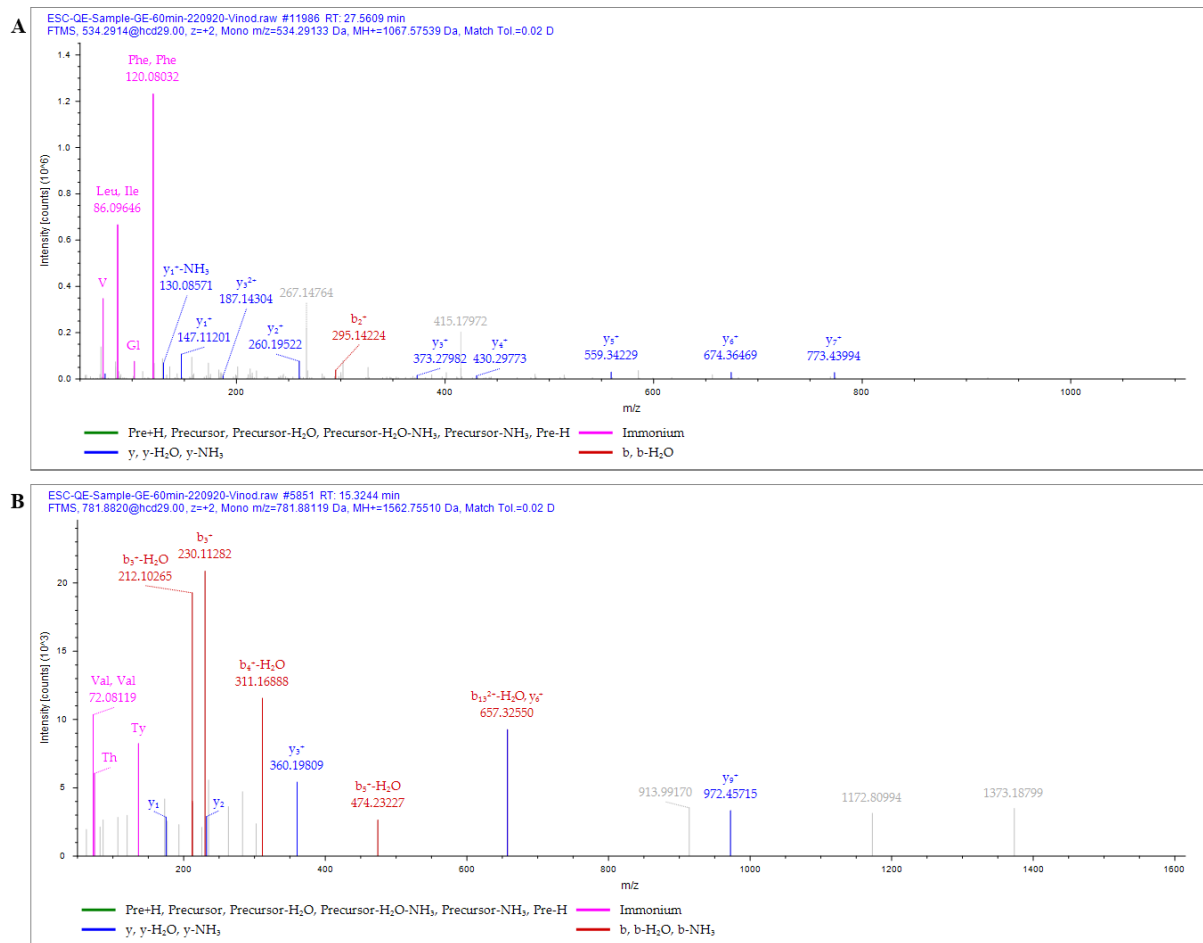

c >A0A0M2NSM8|Lipoprotein OS=*Staphylococcus pasteurii*  
 MKKILGILLLLTLTVALAACGGKGS DTKIKVGASPAPHA EILEKAKPL  
 LEKKGYKLDIKTINDYTTPNKL LDKGELDANFFQHTPYLKTESKEKG  
 YKIESAGNVELEPMAVYSKKYKSLKDLPK **GATVYVSNNPAEQGR**F  
 LK**FFVDEGLIK**IKKGVKIEDAKFSDITENKKDIKFNNKQSAEFLPKIY  
 QKQDADAVIINSNYALDQKLNP KKDSIAYEKAKDNPYANLIAVKDGH  
 KDDKKIKALMEVLQSK EIRDYINKEYDGA VVPAK

**Figure S3. Tandem mass spectrum of Lpp.** Two representative MS/MS peptide sequences –143–FFVDEGLIK-151 (A) and 125-GATVYVSNNPAEQGR-139 (B) of Lpp found in the secretome of *S. pasteurii*. Matched representative peptides of Lpp are highlighted in underlined bold red (C).

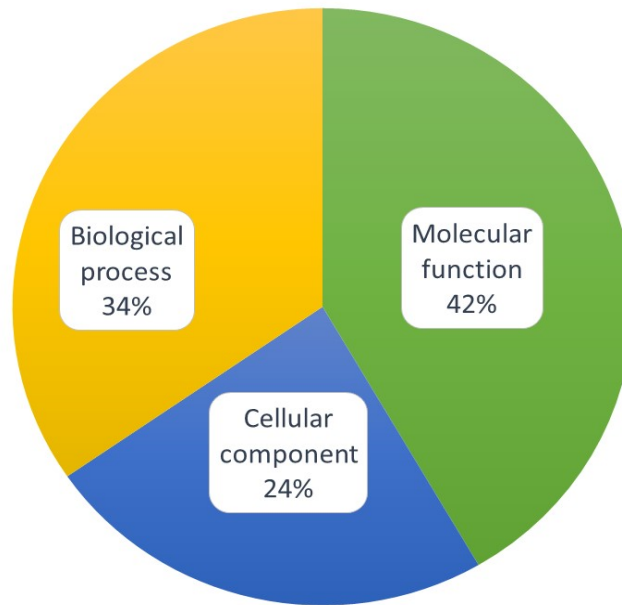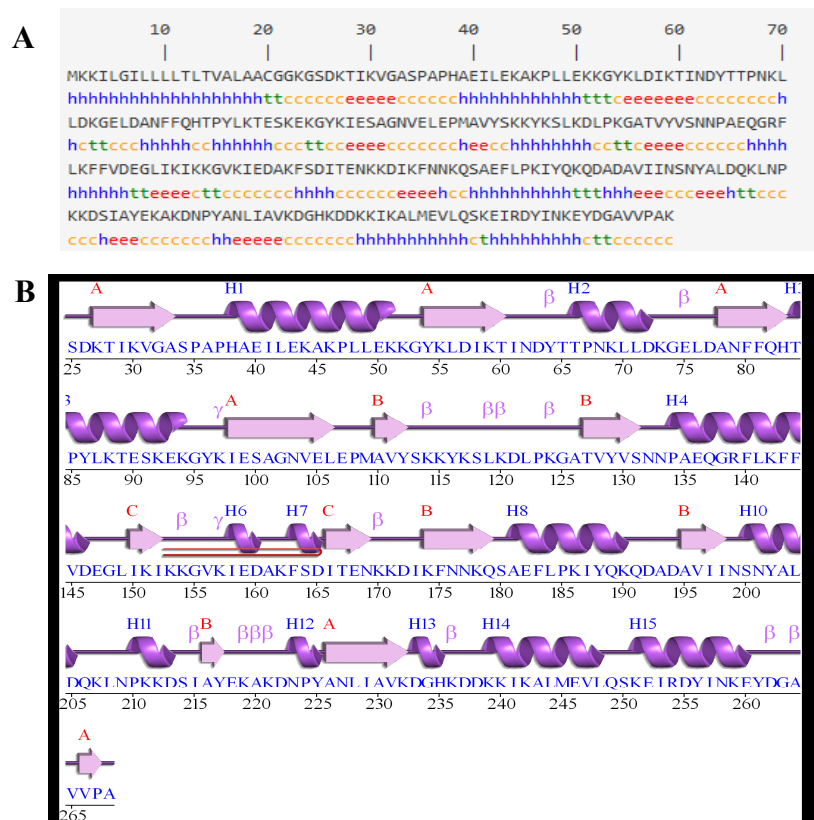



**Table S3. The Lpp-compounds/ligand interactions.** The values of molecular docking score were retrieved by the best interactions based on dock possess, and Hydrogen bond. The significant Pi-sigma interaction was observed in Valeric acid, and the residues are indicated with bold for Pi-stackinginteractions.

| Identified compounds                      | PubChem | Moldock score | Est. free energy of binding (kcal/mol) | Binding frequency | H-bond         | Hydrophobic interactions     | Pi-stackinginteractions      | Dock posses |
|-------------------------------------------|---------|---------------|----------------------------------------|-------------------|----------------|------------------------------|------------------------------|-------------|
| Acetic acid                               | 176     | -26.827       | -2.79                                  | 75%               | K142, K221     | P224                         |                              | 1           |
| Butanoic acid                             | 264     | -26.005       | -2.84                                  | 36%               | K142, K221     | I158, E159, P224, Y225       |                              | 2           |
| Propanoic acid                            | 1032    | -35.485       | -2.85                                  | 72%               |                |                              | M109, V130, P140, I197       | 1           |
| Isobutyric acid (2-methyl-Propanoic acid) | 6590    | -39.43        | -3.07                                  | 34%               |                | S131, N133, E136, Q137, F140 | M109, V130, R139, F163, I197 | 1           |
| Valeric acid (2-Methylbutanoic acid)      | 7991    | -63.079       | -3.16                                  | 44%               | Y64, H83, N199 | Q82, E107, E136, N201, N227  | <b>F81, Y86</b>              | 2           |
| Isovaleric acid (3-Methylbutanoic acid)   | 10430   | -55.061       | -3.31                                  | 48%               | N227           | F81, Q82, M109, N199,        | H38, Y64, H83                | 1           |

---

**acid)**

---

---

S200, N201

---
